# Supplementary material
Source: publisher site journal article supplement (https://www.dovepress.com/article/337947)
Supplement: Supplementary file 1 [file get_supplementary_file.php]

Table S1. Hardy-Weinberg equilibrium

| Gene | Variant | Allele | % | Genotype | N (%) | P.value |
| --- | --- | --- | --- | --- | --- | --- |
| CYP3A4 | rs2740574 (*1B) | T C | 100 0 | TT TC | 201(100) 0 | 1 |
| CYP3A4 | rs35599367 (*22) | G A | 99.5 0.5 | GG GA | 200(99.5) 1(0.5) | 0.562 |
| CYP3A5 | rs776746 (*3) | C T | 66.2 33.8 | CC TC TT | 85(42.3) 96(47.8) 20(9.9) | 0.797 |
| ABCB1 | rs1128503 (1236C>T) | T C | 59.0  41.0 | TT TC CC | 74(36.8) 89(44.3) 38(18.9) | 0.713 |
| ABCB1 | rs2032582 (2677G>A) | G A | 55.7  44.3 | GG GA AA | 65(32.3) 94(46.8) 42(20.9) | 0.883 |
| ABCB1 | rs1045642 (3435C>T) | C T | 61.9  38.1 | TT TC CC | 32(15.9) 89(44.3) 80(39.8) | 0.819 |
| ABCC2 | rs717620 | T C | 21.4  78.6 | TT TC CC | 11(5.5) 64(31.8) 126(62.7) | 0.845 |
| ABCC2 | rs2273697 | G A | 90.8 9.2 | GG GA AA | 165(82.1) 35(17.4) 1(0.5) | 0.840 |
| ABCC2 | rs3740066 | C T | 76.7  23.3 | TT TC CC | 10(5.0) 74(36.8) 117(58.2) | 0.961 |
| POR28 | rs2868177 | C T | 40.0  60.0 | TT TC CC | 72(35.8) 97(48.3) 32(15.9) | 1 |
| PXR | rs6785049 | G A | 59.5 40.5 | GG GA AA | 66(32.9) 107(53.2) 28(13.9) | 0.582 |

Table S2. Univariate analysis of tacrolimus C0/D

|  | | C0/Da |
| --- | --- | --- |
| **Recipients** |  |  |
| Sex | Pearson correlation | -0.061 |
| P.value | 0.390 |
| Age | Pearson correlation | -0.053 |
| P.value | 0.453 |
| BMI | Pearson correlation | 0.142* |
| P.value | 0.046 |
| **Donors** |  |  |
| Sex | Pearson correlation | -0.074 |
| P.value | 0.323 |
| Age | Pearson correlation | -0.120 |
| P.value | 0.113 |
| BMI | Pearson correlation | 0.050 |
| P.value | 0.505 |
| Hypertension | Pearson correlation | 0.061 |
| P.value | 0.389 |
| Anemia | Pearson correlation | -0.187** |
| P.value | 0.008 |
| Diabetes | Pearson correlation | 0.014 |
| P.value | 0.839 |
| Coronary heart disease | Pearson correlation | 0.014 |
| P.value | 0.840 |
| hepatitis B | Pearson correlation | -0.014 |
| P.value | 0.848 |
| arthrolithiasis | Pearson correlation | -0.005 |
| P.value | 0.947 |
| CYP3A5*3(rs776746) | Pearson correlation | -0.316** |
| P.value | <0.001 |
| ABCB1 (rs1128503) | Pearson correlation | 0.061 |
| P.value | 0.410 |
| ABCB1 (rs2032582) | Pearson correlation | 0.085 |
| P.value | 0.247 |
| ABCB1 (rs1045642) | Pearson correlation | 0.082 |
| P.value | 0.267 |
| ABCC2 (rs717620) | Pearson correlation | -0.173* |
| P.value | 0.018 |
| ABCC2 (rs2273697) | Pearson correlation | 0.053 |
| P.value | 0.475 |
| ABCC2(rs37400660) | Pearson correlation | -0.158* |
| P.value | 0.031 |
| POR28 (rs2868177) | Pearson correlation | 0.046 |
| P.value | 0.530 |
| PXR (rs6785049) | Pearson correlation | -0.022 |
| P.value | 0.769 |
| WBC | Pearson correlation | 0.113 |
| P.value | 0.245 |
| RBC | Pearson correlation | 0.198* |
| P.value | 0.006 |
| HGB | Pearson correlation | 0.319** |
| P.value | <0.001 |
| Neu | Pearson correlation | 0.187** |
| P.value | 0.006 |
| PLT | Pearson correlation | 0.070 |
| P.value | 0.335 |
| HCT | Pearson correlation | 0.105 |
| P.value | 0.148 |
| AST | Pearson correlation | 0.098 |
| P.value | 0.174 |
| ALT | Pearson correlation | 0.083 |
| P.value | 0.261 |
| ALP | Pearson correlation | -0.138 |
| P.value | 0.062 |
| TBiL | Pearson correlation | 0.031 |
| P.value | 0.677 |
| TP | Pearson correlation | -0.070 |
| P.value | 0.347 |
| ALB | Pearson correlation | -0.225** |
| P.value | 0.002 |
| Cre | Pearson correlation | -0.091 |
| P.value | 0.213 |
| BUN | Pearson correlation | -0.198** |
| P.value | 0.006 |
| Uric acid | Pearson correlation | -0.039 |
| P.value | 0.595 |
| WZC | Pearson correlation | 0.205** |
| P.value | <0.001 |
